# Supplementary material for: Nrf2 Activation by 5-lipoxygenase Metabolites in Human Umbilical Vascular Endothelial Cells
Source: PubMed Central journal article supplement (PMC5622761; doi:10.3390/nu9091001), 2017-09-11
Supplement: nutrients-09-01001-s001.pdf [file nutrients-09-01001-s001.pdf]

## Supplementary Materials: Nrf2 Activation by 5-lipoxygenase Metabolites in Human Umbilical Vascular Endothelial Cells

Nozomi Nagahora, Hidetoshi Yamada, Sayaka Kikuchi, Mayuka Hakozaiki and Akira Yano

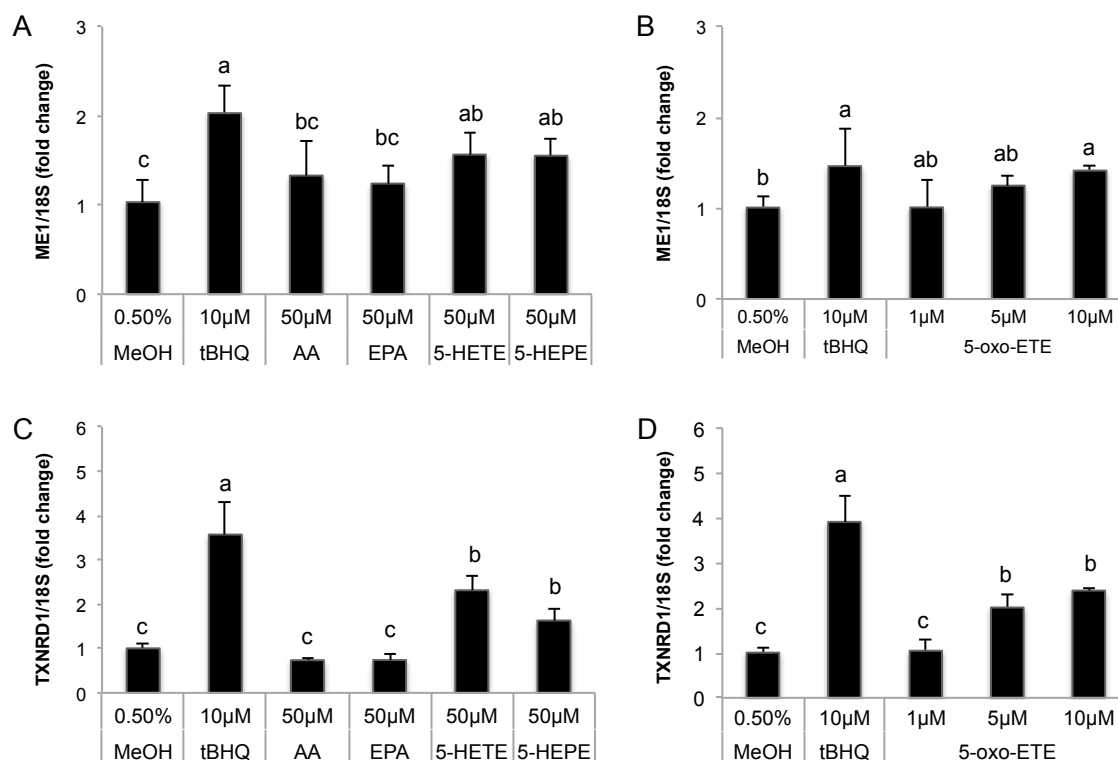

**Figure S1.** Gene expression of Malic enzyme 1 (ME1) and thioredoxin reductase 1 (TXNRD1) in HUVECs treated with eicosanoids for 6 h. Effects of 0.5% MeOH (vehicle), 10 µM tBHQ (Nrf2 activator), AA, EPA, 5-HETE, or 5-HEPE (50µM) on ME1 expression (A), and effects of 1, 5, or 10 µM 5-oxo-EETE, on ME1 expression (B) was displayed. Effects of 0.5% MeOH, 10 µM tBHQ, AA, EPA, 5-HETE, or 5-HEPE (50µM) on TXNRD1 expression (C), and effects of 1, 5, or 10 µM 5-oxo-EETE, on TXNRD1 expression (D) was presented. Data are expressed as mean ± SD ( $n = 4$ ). Significant differences among the groups are indicated with different letters (one-way ANOVA followed by a post hoc Tukey's test,  $p < 0.05$ ).
